# Supplementary material for: Emotional Dysregulation Mechanisms in Psychosomatic Chronic Diseases Revealed by the Instability Coefficient
Source: PubMed Central journal article supplement (PMC7601642; doi:10.3390/brainsci10100673), 2020-09-25
Supplement: brainsci-10-00673-s001.pdf [file brainsci-10-00673-s001.pdf]

Supplementary materials

**Table S1.** Correlations between variables (Pearson’s and Spearman’s coefficients); AGE/ $\Delta$ /ED/NA/PAT/NAT/PAS/NAS; ( $\Delta$  – “Instability Coefficients”, ED – Emotion Dysregulation, NA – Negative Affect, PAT – Positive Affect of Trait, NAT – Negative Affect of Trait, PAS – Positive Affect of State, PAT – Positive Affect of State ).

|                     | AGE    |        | AGE      |          |
|---------------------|--------|--------|----------|----------|
|                     | Mean   | SD     | <i>r</i> | <i>p</i> |
| $\Delta$ ED         | 4.839  | 1.802  | 0.031    | 0.639    |
| $\Delta$ strategies | 2.176  | 1.535  | 0.049    | 0.450    |
| $\Delta$ awareness  | 1.486  | 1.131  | 0.005    | 0.934    |
| $\Delta$ impulse    | 2.022  | 1.224  | 0.030    | 0.650    |
| $\Delta$ goals      | 1.684  | 1.282  | -0.042   | 0.517    |
| $\Delta$ clarity    | 2.043  | 1.364  | 0.111    | 0.089    |
| ED                  | 73.823 | 18.571 | 0.111    | 0.090    |
| NA                  | 36.53  | 13.15  | -0.068   | 0.301    |
| PAT                 | 31.03  | 6.815  | -0.090   | 0.166    |
| NAT                 | 18.62  | 6.777  | -0.109   | 0.093    |
| PAS                 | 28.52  | 6.866  | 0.072    | 0.272    |
| NAS                 | 18.14  | 7.886  | -0.002   | 0.976    |

**Table S2.** Differences between groups (Independent Samples T-Test). Gender groups: Gr. 1 - Females; Gr. 2 – Males.

|                     | Females<br>N = 189 |        | Males<br>N = 94 |        | <i>t</i> | <i>p</i> |
|---------------------|--------------------|--------|-----------------|--------|----------|----------|
|                     | Mean               | SD     | Mean            | SD     |          |          |
| $\Delta$ ED         | 4.471              | 1.832  | 5.039           | 1.733  | -1.196   | 0.233    |
| $\Delta$ strategies | 2.235              | 1.638  | 2.056           | 1.304  | 0.837    | 0.403    |
| $\Delta$ awareness  | 1.439              | 1.074  | 1.579           | 1.240  | -0.849   | 0.374    |
| $\Delta$ impulse    | 1.967              | 1.216  | 2.135           | 1.239  | -0.986   | 0.322    |
| $\Delta$ goals      | 1.679              | 1.244  | 1.694           | 1.362  | -0.084   | 0.931    |
| $\Delta$ clarity    | 1.867              | 1.323  | 2.199           | 1.385  | -2.815   | 0.009    |
| ED                  | 74.19              | 19.574 | 73.08           | 16.448 | 0.432    | 0.647    |
| NA                  | 36.70              | 13.584 | 36.18           | 12.300 | 0.283    | 0.770    |
| PAT                 | 31.25              | 6.086  | 30.59           | 8.120  | 0.632    | 0.487    |
| NAT                 | 18.85              | 6.805  | 18.15           | 6.038  | 0.740    | 0.458    |
| PAS                 | 29.33              | 6.250  | 26.83           | 7.766  | 2.451    | 0.016    |
| NAS                 | 17.96              | 7.870  | 18.50           | 7.961  | -0.486   | 0.626    |

\*\* . The difference is significant at the  $p \leq 0.004$  level (Bonferroni adjusted *p*-value).

**Table S3.** Correlations between variables (Pearson’s and Spearman’s coefficients);  $\Delta$ /ED;  $\Delta$  /NA. Chronic Disease Group (N = 137); ( $\Delta$  = “Instability Coefficients”; ED = Emotion Dysregulation; NA = Negative Affect).

|                     | ED       |          | NA       |          |
|---------------------|----------|----------|----------|----------|
|                     | <i>r</i> | <i>p</i> | <i>r</i> | <i>p</i> |
| $\Delta$ ED         | -0.027   | 0.777    | -0.206   | 0.030    |
| $\Delta$ strategies | 0.081    | 0.401    | -0.100   | 0.298    |
| $\Delta$ awareness  | -0.058   | 0.544    | -0.050   | 0.599    |

|                                   |        |       |        |       |
|-----------------------------------|--------|-------|--------|-------|
| <b><math>\Delta</math>impulse</b> | 0.075  | 0.435 | -0.163 | 0.087 |
| <b><math>\Delta</math>goals</b>   | 0.011  | 0.812 | -0.071 | 0.460 |
| <b><math>\Delta</math>clarity</b> | -0.017 | 0.860 | -0.152 | 0.112 |

\*\* Correlation is significant at the 0.008 level (Bonferroni adjusted  $p$ -value).

**Table S4.** Correlations between variables (Pearson's coefficients);  $\Delta$ /ED;  $\Delta$ /NA; .Hypertension Group (N = 41); ( $\Delta$  – "Instability Coefficients"; ED – Emotion Dysregulation; NA = Negative Affect).

|                                      | ED     |       | NA     |       |
|--------------------------------------|--------|-------|--------|-------|
|                                      | $r$    | $p$   | $r$    | $p$   |
| <b><math>\Delta</math>ED</b>         | 0.090  | 0.625 | 0.237  | 0.192 |
| <b><math>\Delta</math>strategies</b> | 0.113  | 0.538 | 0.109  | 0.553 |
| <b><math>\Delta</math>awareness</b>  | -0.071 | 0.700 | 0.096  | 0.602 |
| <b><math>\Delta</math>impulse</b>    | 0.208  | 0.254 | -0.001 | 0.894 |
| <b><math>\Delta</math>goals</b>      | 0.013  | 0.942 | -0.172 | 0.346 |
| <b><math>\Delta</math>clarity</b>    | 0.207  | 0.257 | 0.275  | 0.127 |

\*\* Correlation is significant at the 0.008 level (Bonferroni adjusted  $p$ -value).
